# Supplementary material for: Comparison of Antibody Responses against Two Molecules from Ascaris lumbricoides: The Allergen Asc l 5 and the Immunomodulatory Protein Al-CPI
Source: MDPI journal article supplement (doi:10.3390/biology12101340), 2023-10-16
Supplement: s1 [file s1]

**Table S1.** Dilutions for ELISA assays in mouse experiments.

| Isotypes     | Plasma dilutions | Secondary antibody dilutions |
|--------------|------------------|------------------------------|
| <i>IgE</i>   | 1:10             | 1:1000                       |
| <i>IgG1</i>  | 1:80000          | 1:10000                      |
| <i>IgG2a</i> | 1:320            | 1:1000                       |

**Table S2.** Relationship between antibody responses to Al-CPI and Asc l 5 with *Ascaris* infection.

|          | Non-infected |      | Infected |      |
|----------|--------------|------|----------|------|
| rAsc l 5 |              |      |          |      |
| IgE+     | 52           | 54.7 | 99       | 50.8 |
| IgG+     | 62           | 67.4 | 139      | 72.0 |
| IgG4+    | 68           | 73.9 | 128      | 66.3 |
| rAl-CPI  |              |      |          |      |
| IgE+     | 42           | 44.2 | 77       | 39.5 |
| IgG+     | 65           | 70.7 | 150      | 77.7 |
| IgG4+    | 73           | 79.3 | 158      | 81.4 |

**Table S3.** Median levels of antibody responses to *Ascaris* antigens.

| Antigen  | Non-infected |      |      | Infected |      |      |
|----------|--------------|------|------|----------|------|------|
|          | Median       | IQR  |      | Median   | IQR  |      |
|          |              | 25   | 75   |          | 25   | 75   |
| rAsc l 5 |              |      |      |          |      |      |
| IgE+     | 0,157        | 0,11 | 0,26 | 0,15     | 0,12 | 0,22 |
| IgG+     | 0,363        | 0,31 | 0,42 | 0,39     | 0,32 | 0,46 |
| IgG4+    | 0,217        | 0,15 | 0,55 | 0,20     | 0,16 | 0,32 |
| rAl-CPI  |              |      |      |          |      |      |
| IgE+     | 0,124        | 0,10 | 0,19 | 0,12     | 0,10 | 0,18 |
| IgG+     | 0,407        | 0,29 | 0,54 | 0,44     | 0,33 | 0,55 |
| IgG4+    | 0,258        | 0,17 | 0,48 | 0,25     | 0,18 | 0,44 |

*IQR: interquartile range.*

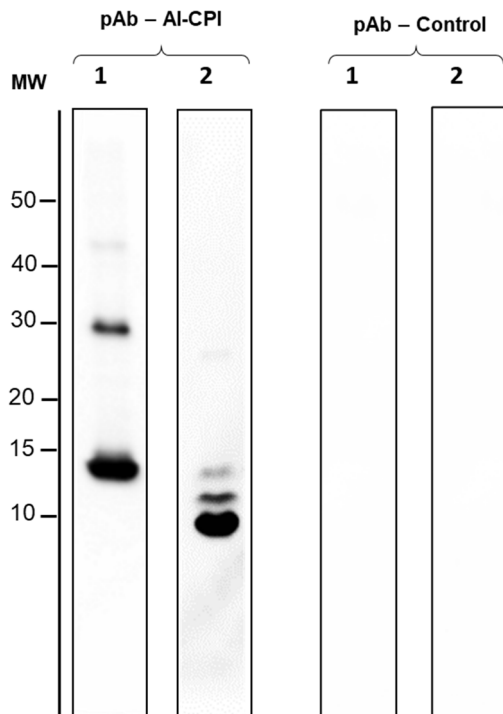

**Figure S1.** Recognition of CPI in the natural extract of *Ascaris lumbricoides*. Left, Anti-AI-CPI polyclonal antibody raised from three rAI-CPI immunized mice (pAb-AI-CPI) was tested against rAI-CPI (Lane 1) or the natural extract of *A. lumbricoides* (Lane 2). Right, same experiments were performed with PBS-immunized mice. Difference in the molecular weight (MW) between native and recombinant AI-CPI is due to the extra amino acids added in the recombinant plasmid.

A

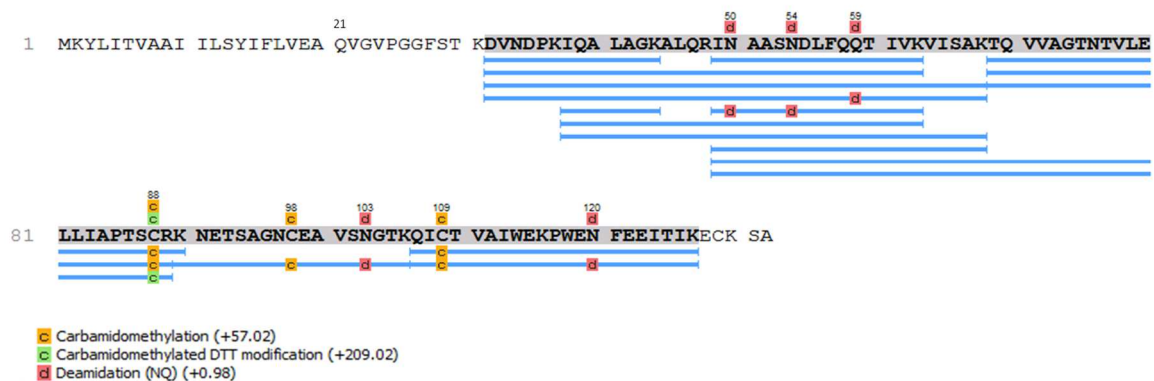

**Figure S2.** Mass spectrometric analysis of peptide coverage of natural AI-CPI. Blue lines indicate peptides in the *A. lumbricoides* extract matching mature sequence of AI-CPI. The amino acid sequence of AI-CPI (HQ404231.1) is shown. Amino acids from 1 to 20 correspond to the signal peptide. Mature AI-CPI starts in amino acid number 21.

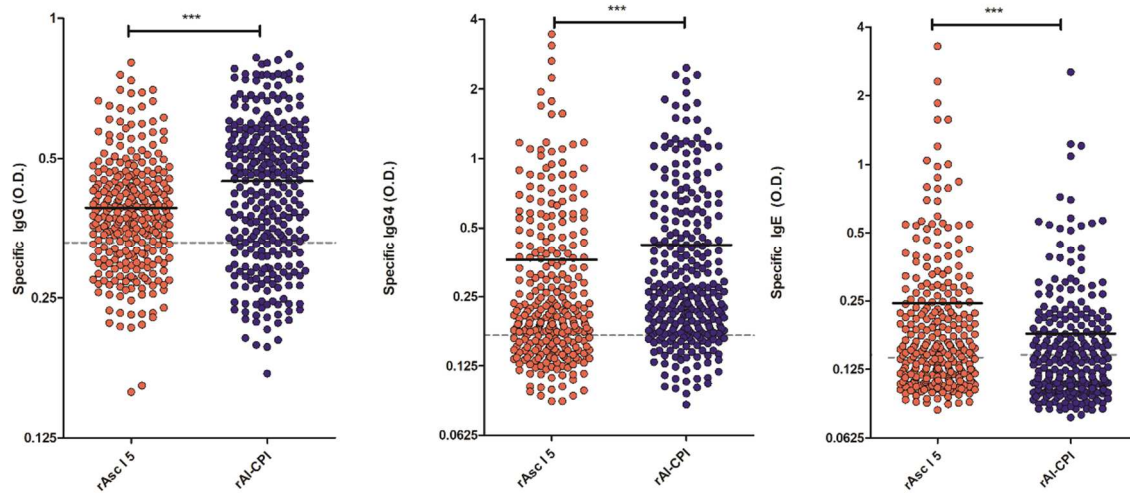

**Figure S3.** Specific IgE, IgG4 and IgG to Asc I 5 and Al-CPI in the study sample. Each dot represents the mean value obtained for each subject sample (tested by duplicate). The dashed line corresponded to the cut-off value calculated for each assay. \*\*\* p < 0.001.

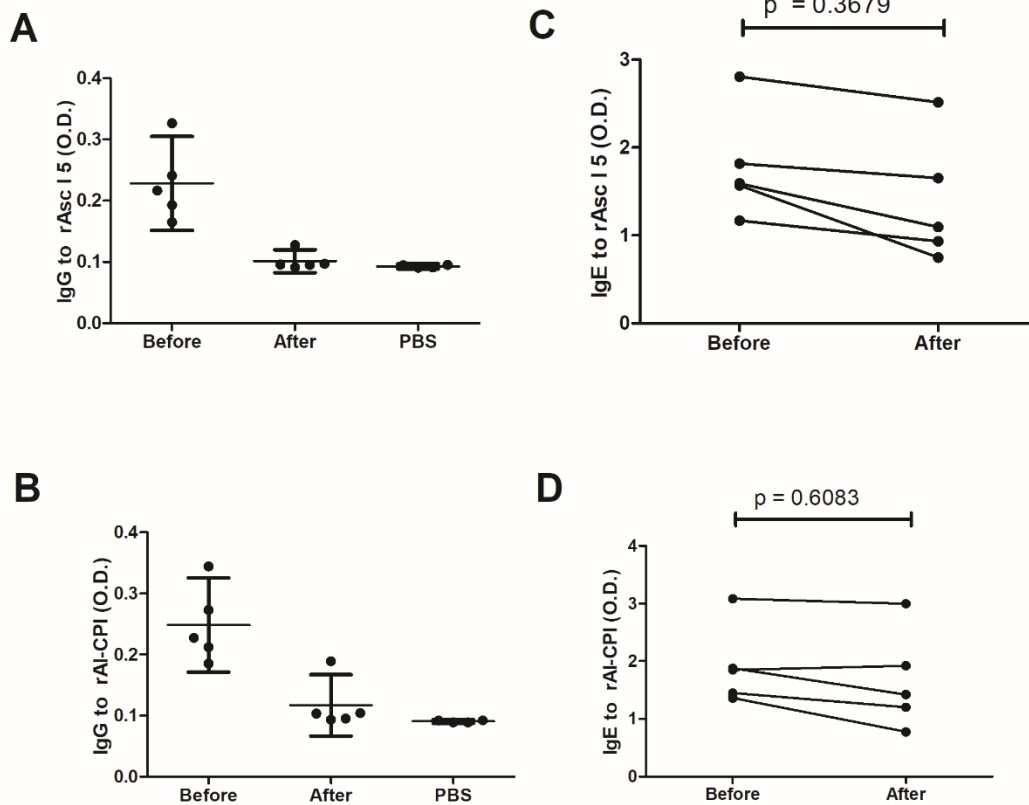

**Figure S4.** rAsc I 5 or rAl-CPI specific IgG do not block IgE binding to these molecules. IgG levels to rAsc I 5 (A) or rAl-CPI (B) were measured in sera from 5 IgE sensitized individuals before and after incubation with protein G. Thereafter, binding of IgG and IgE to Al-16 or CPI were assessed (C) and (D). Black lines indicate mean values + 95% confidence interval. PBS, buffer control; O.D. optical density.
